# Supplementary material for: Morphology and element doping effects: phosphorus-doped hollow polygonal g-C3N4 rods for visible light-driven CO2 reduction
Source: Royal Society of Chemistry journal article supplement (doi:10.1039/d1nj05736g), 2022-01-01
Supplement: d1nj05736g1.pdf [file d1nj05736g1.pdf]

## Supporting Information

# Morphology and Element Doping Effect : Phosphorus-Doped Hollow Polygonal g- C<sub>3</sub>N<sub>4</sub> Rods for Visible Light-Driven CO<sub>2</sub> Reduction

Wen-Feng Wang<sup>a</sup>, Li-Qi Qiu<sup>b</sup>, Kai-Hong Chen<sup>b</sup>, Hong-Ru Li<sup>b</sup>, Lie-Feng Feng<sup>a\*</sup>,  
Liang-Nian He<sup>b\*</sup>

<sup>a</sup> *Tianjin Key Laboratory of Low Dimensional Materials Physics and Preparing  
Technology, Department of Applied Physics, School of Science, Tianjin University,  
Tianjin 300350, China*

<sup>b</sup> *State Key Laboratory and Institute of Elemento-Organic Chemistry, College of  
Chemistry, Nankai University, Tianjin 300071, China*

Corresponding author: Liefeng Feng; +86-18622730034; [fengliefeng@tju.edu.cn](mailto:fengliefeng@tju.edu.cn)

Corresponding author: Liang-Nian He; +86-22-23503878; [heln@nankai.edu.cn](mailto:heln@nankai.edu.cn)

### Quantitative analysis of product gases

After the reaction, partial gaseous products (1 mL) were taken from the tube using a syringe, and then analyzed by gas chromatography (GC, FuLi 9790II) with a TCD detector to determine the moles of CO. Afterwards, the total moles of CO obtained in the photocatalytic CO<sub>2</sub> reduction was calculated with the headspace volume of the Schlenk tube.

$$V_{co} = (S_{co}/S_{co(1mL)}) / \left( \frac{S_{H_2}}{S_{H_2(1mL)}} + \frac{S_{co_2}}{S_{Hco_2(1mL)}} + \frac{S_{co}}{S_{co(1mL)}} \right) \cdot V_{tube} \quad (1)$$

$$V_{H_2} = (S_{H_2}/S_{H_2(1mL)}) / \left( \frac{S_{H_2}}{S_{H_2(1mL)}} + \frac{S_{co_2}}{S_{Hco_2(1mL)}} + \frac{S_{co}}{S_{co(1mL)}} \right) \cdot V_{tube} \quad (2)$$

$$n_{co} = P \cdot V_{co} / RT \quad (3)$$

$$n_{H_2} = P \cdot V_{H_2} / RT \quad (4)$$

$$Selectivity(S) = \left[ \frac{n_{co}}{(n_{co} + n_{H_2})} \right] \cdot 100\% \quad (5)$$

where  $S_{H_2}$ ,  $S_{CO}$ ,  $S_{CO_2}$  represent the integral areas in the gas chromatography spectra (Shown as Fig. S3) of H<sub>2</sub>, CO and CO<sub>2</sub> for 1 mL gaseous products respectively.  $S_{H_2(1mL)}$ ,  $S_{CO(1mL)}$ ,  $S_{CO_2(1mL)}$  represent the integral areas for 1 mL pure H<sub>2</sub>, 1 mL pure CO and 1 mL pure CO<sub>2</sub>, respectively. In addition,  $V_{tube}$  (mL),  $V_{CO}$  (mL) and  $V_{H_2}$  (mL) is the headspace volume of the Schlenk tube and the volume of CO and H<sub>2</sub> in the total gaseous products. And  $n_{co}$  (μmol) and  $n_{H_2}$  (μmol) represent the total moles of CO and H<sub>2</sub> in the headspace of the Schlenk tube.

### Quantum efficiency calculation

Measurement of the Number of Moles of Photons: To a 25 mL flask, Ru(bpy)<sub>3</sub>Cl<sub>2</sub> (0.1 mM), 1,9-diphenylanthracene (DPA, 0.1 mM) and 25 mL acetonitrile were added. After that, the absorbance at 372 nm was recorded as  $A_{INITIAL}$ . Then, the sample was irradiated under 500 W Xenon long-arc lamp ( $\lambda \geq 400$  nm) for 10 min and a new UV-Vis spectra of sample at 372 nm was recorded, which was denoted as  $A_{FINAL}$ . The equation below was used to calculate the moles of consumed DPA.

$$\text{moles DPA consumed} = \left( \frac{A_{INITIAL} - A_{FINAL}}{\epsilon_{372nm} l} \right) \times V$$

Where  $A_{\text{INITIAL}}$  and  $A_{\text{FINAL}}$  are the absorbance of the solution at 372 nm before and after irradiation, respectively;  $\epsilon_{372\text{nm}}$  is the extinction coefficient of DPA at 372 nm in acetonitrile ( $11000 \text{ M}^{-1}\text{cm}^{-1}$ ),  $l$  is the path length of the cuvette (1 cm), and  $V$  is the volume of sample for which the absorption was measured (3 mL). Since the quantum yield ( $\Phi$ ) for  $\text{Ru}(\text{bpy})_3\text{Cl}_2$  is known to be 0.019, the moles of photons absorbed by our sample per unit time  $\frac{Nh\nu}{t}$  were determined using the consumed moles of DPA by following equation:

$$\frac{Nh\nu}{t} = \frac{\text{moles of DPA consumed}}{\Phi t}$$

Where  $\Phi$  is quantum yield of DPA consumption and  $t$  is the irradiation time (seconds).

To determine the  $\Phi_{\text{CO}}$  in our reaction, we applied the equation:

$$\Phi_{\text{CO}}(\%) = \frac{\frac{\# \text{ moles of CO}}{t'} \times 2}{\frac{Nh\nu}{t}} \times 100\%$$

Where  $t'$  is the reaction time for photocatalytic  $\text{CO}_2$  reduction and  $\frac{Nh\nu}{t}$  is the number of photons absorbed by the sample per unit time.

### Effect of P-doping level and morphology of g- $\text{C}_3\text{N}_4$ on the activity

In order to further confirm the effect of P doping and morphology change on the performance g- $\text{C}_3\text{N}_4$ , the P-doped g- $\text{C}_3\text{N}_4$  with different P contents were prepared in the same way as P-HCNR by changing the amount of phosphoric acid used in the preparation process. Specifically, 4 mL and 2 mL phosphoric acid were added to the melamine aqueous solution and the pH values of the resulting solutions were 2.5 and 3.5 respectively with vigorous stirring for 1 h. And then, the mixture was transferred into a 500 mL Teflon-lined stainless-steel autoclave for subsequent hydrothermal reaction at 180 °C for 6 h. The obtained mixture was filtered, washed with a small amount of deionized water and dried in an oven at 80 °C for 6 h. Finally, the obtained solid was calcined at 550 °C for 4 h in the tube furnace under argon atmosphere, affording the final product denoted as P-HCNR2 and P-HCNR3.

Moreover, the common P-doped g- $\text{C}_3\text{N}_4$  denoted as P-CN was also prepared. In detail, 3 g melamine and 6 mL phosphoric acid (85%) were dissolved in 300 mL deionized water and stirred for 1 h. Subsequently, the mixture was filtered and dried in

an oven at 80 °C for 6 h. Finally, the final P-CN was obtained by calcining at 550 °C for 4 h in the tube furnace under argon atmosphere.

Subsequently, the activities of photocatalytic CO<sub>2</sub> reduction were tested and compared. The activities of all samples were displayed in Table S2.

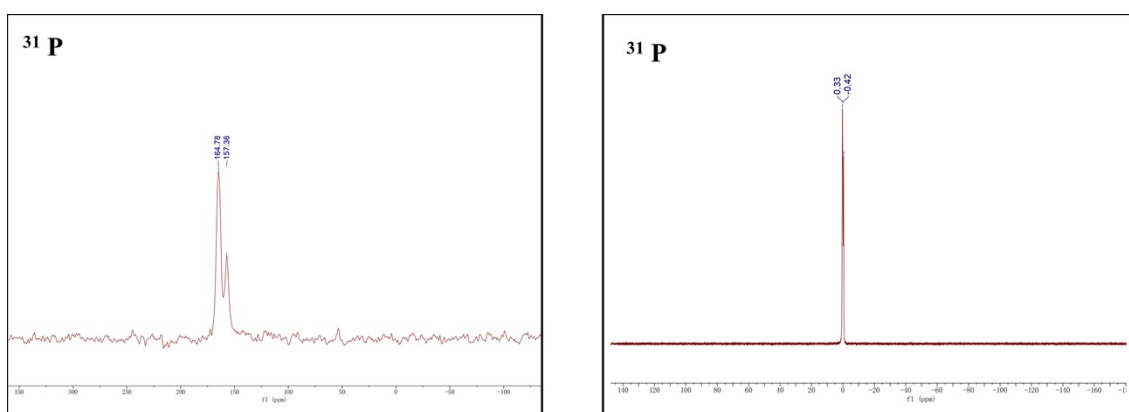

**Fig. S1.** <sup>31</sup>P MAS NMR spectra of P-HCNR and <sup>31</sup>P NMR of H<sub>3</sub>PO<sub>4</sub> (162 MHz, CDCl<sub>3</sub>).

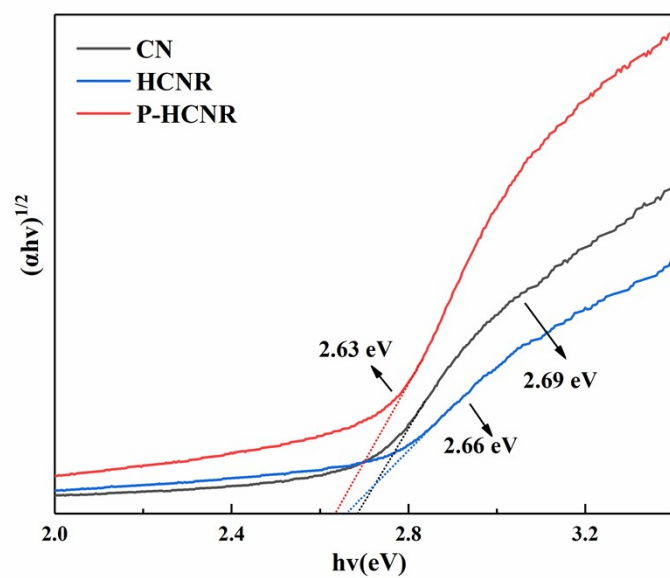

**Fig. S2.** Tauc plots of CN, HCNR and P-HCNR.

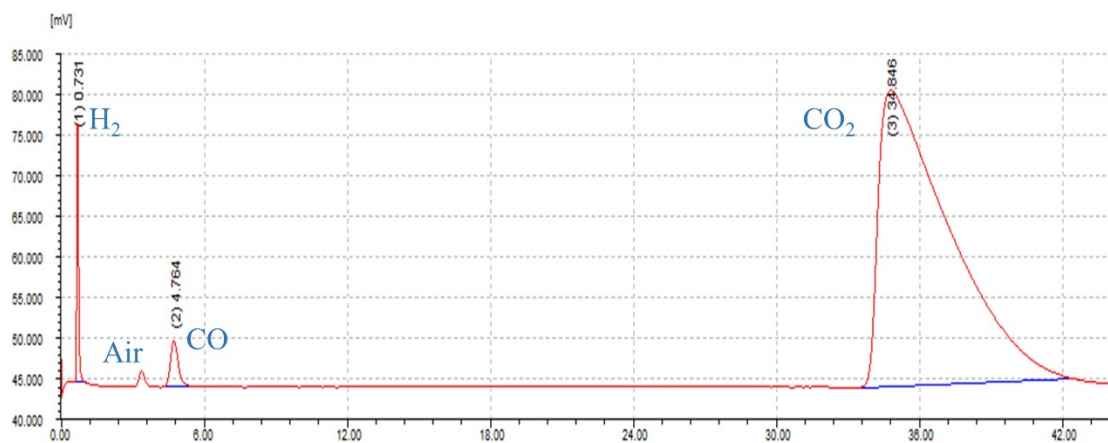

**Fig. S3.** Gas chromatography of product gases.

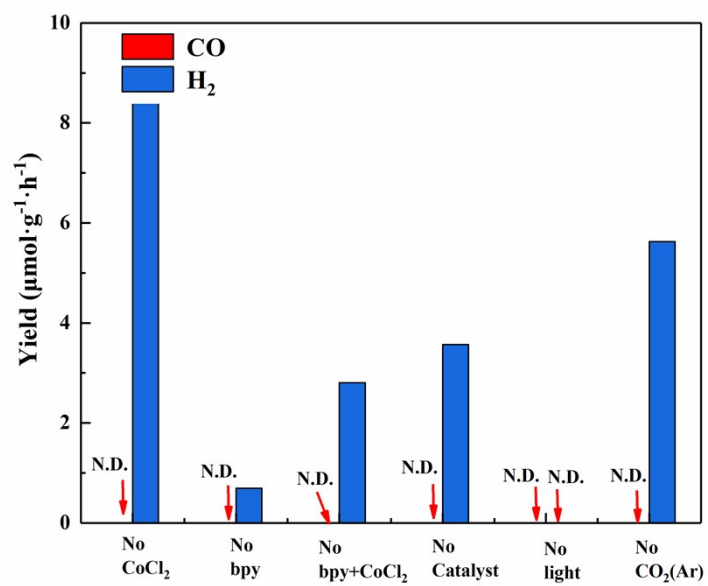

Figure. S4. Control experiments.

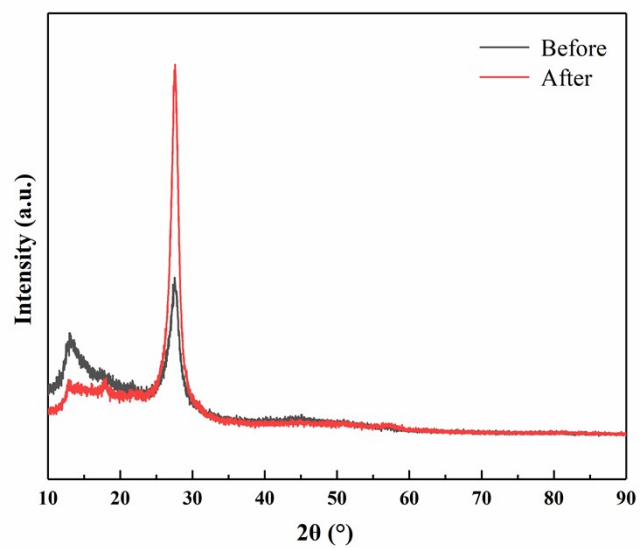

Figure. S5. XRD patterns of the P-HCNR before and after 10 hours' photocatalytic CO<sub>2</sub> reduction reaction.

**Table S1** Effect of CoCl<sub>2</sub> amount on CO/H<sub>2</sub> evolution and selectivity to CO.

| Entry | CoCl <sub>2</sub> (μmol) | CO(μmol/g·h) | H <sub>2</sub> (μmol/g·h) | Selectivity (%) |
|-------|--------------------------|--------------|---------------------------|-----------------|
| 1     | 0                        | 0            | 8.43                      | /               |
| 2     | 0.1                      | 81.29        | 1.65                      | 98              |
| 3     | 0.5                      | 227.41       | 4.89                      | 98              |
| 4     | 1                        | 447.53       | 16.05                     | 97              |
| 5     | 1.5                      | 280.10       | 6.68                      | 97              |
| 6     | 2                        | 227.42       | 4.89                      | 97              |
| 7     | 4                        | 78.86        | 3.23                      | 96              |

**Table S2** CO/H<sub>2</sub> evolution and selectivity to CO for CN · HCNR, P-HCNR, P-HCNR2 and P-HCNR3.

| Entry | Sample  | CO(μmol/g·h) | H <sub>2</sub> (μmol/g·h) | Selectivity (%) |
|-------|---------|--------------|---------------------------|-----------------|
| 1     | CN      | 67.01        | 3.55                      | 94              |
| 2     | HCNR    | 256.40       | 24.17                     | 91              |
| 3     | P-HCNR  | 447.53       | 16.05                     | 96              |
| 4     | P-CN    | 121.34       | 2.43                      | 98              |
| 5     | P-HCNR2 | 120.54       | 3.34                      | 97              |
| 6     | P-HCNR3 | 83.02        | 1.93                      | 97              |

**Table S3** Control experiments.

| Entry | Condition <sup>a</sup>    | CO(μmol/g·h) | H <sub>2</sub> (μmol/g·h) |
|-------|---------------------------|--------------|---------------------------|
| 1     | no CoCl <sub>2</sub>      | 0            | 8.44                      |
| 2     | no bpy                    | 0            | 0.69                      |
| 3     | no bpy +CoCl <sub>2</sub> | 0            | 2.80                      |
| 4     | no catalyst               | 0            | 3.56                      |
| 5     | dark                      | 0            | 0                         |
| 6     | Ar                        | 0            | 5.62                      |

<sup>a</sup>Deviation from standard method

| Materials                                                                        | Cocatalyst                             | Products and Activity                                 | Sacrificial agent      | References |
|----------------------------------------------------------------------------------|----------------------------------------|-------------------------------------------------------|------------------------|------------|
| P-HCNR                                                                           | [Co(bpy) <sub>3</sub> ]Cl <sub>2</sub> | CO: 447.5 mol/g·h<br>Selectivity = 96%                | TEOA                   | This work  |
| C-doped BN nanosheet                                                             | [Co(bpy) <sub>3</sub> ]Cl <sub>2</sub> | CO: 93 μmol/g·h<br>Selectivity = 76%                  | TEOA                   | [1]        |
| mtw-CNT                                                                          | [Co(bpy) <sub>3</sub> ]Cl <sub>2</sub> | CO: 253.3 μmol/g·h<br>Selectivity = 96%               | TEOA                   | [2]        |
| Co <sup>2+</sup> doped 0D/2D TiO <sub>2</sub> /g-C <sub>3</sub> N <sub>4</sub>   | [Co(bpy) <sub>3</sub> ]Cl <sub>2</sub> | CO: 290 μmol/g·h<br>/                                 | TEOA                   | [3]        |
| TiO-CN                                                                           | [Co(bpy) <sub>3</sub> ]Cl <sub>2</sub> | CO: 283.9 μmol/g·h<br>Selectivity = 89%               | TEOA                   | [4]        |
| P-doped inverse opal g-C <sub>3</sub> N <sub>4</sub>                             | /                                      | CO: 31.2 μmol/g·h<br>Selectivity = 91%                | H <sub>2</sub> O (gas) | [5]        |
| Ultra-thin porous g-C <sub>3</sub> N <sub>4</sub> (THCN)                         | /                                      | CO: ~1.8 μmol/g·h<br>CH <sub>4</sub> : ~2.1 μmol/g·h  | TEOA                   | [6]        |
| Co <sub>1</sub> -C <sub>3</sub> N <sub>4</sub> /α-Fe <sub>2</sub> O <sub>3</sub> | /                                      | CO: 14.9 μmol/g·h<br>Selectivity > 99%                | H <sub>2</sub> O (gas) | [7]        |
| WO <sub>3</sub> /g-C <sub>3</sub> N <sub>4</sub>                                 | /                                      | CO: 41.47 μmol/g·h<br>CH <sub>4</sub> : 0.75 μmol/g·h | TEOA                   | [8]        |

**Table S4** Comparison of photocatalytic CO<sub>2</sub> reduction performance with C<sub>3</sub>N<sub>4</sub> based materials.

#### Reference:

- [1] C. Huang, C. Chen, M. Zhang, L. Lin, X. Ye, S. Lin, M. Antonietti, X. Wang, Carbon-doped BN nanosheets for metal-free photoredox catalysis, *Nat. Commun.*, 2015, **6**, 7698.
- [2] Y. Chen, X. He, D. Guo, Y. Cai, J. Chen, Y. Zheng, B. Gao, B. Lin, *J. Energy Chem.*, 2020, **49**, 214–223.
- [3] H. Shi, J. Du, J. Ho, W. Ni, C. Song, K. Li, G. G. Gurzadyan, X. Guo, *J. CO<sub>2</sub> Util.*, 2020, **38**, 16–23.



- [4] S. Tang, X. Yin, G. Wang, X. Lu, and T. Lu, *Nano Res.*, 2019, **12**, 457–462.
- [5] X. Huang, W. Gu, S. Hu, Y. Hu, L. Zhou, J. Lei, L. Wang, Y. Liu and J. Zhang, *Catal. Sci. Technol.*, 2020, **10**, 3694–3700.
- [6] B. Yang, J. Zhao, W. Yang, X. Sun, R. Wang, X. Jia, *J. Colloid Interface Sci.*, 2021, **589**, 179–186.
- [7] B.-C. He, C. Zhang, P.-P. Luo, Y. Li, T.-B. Lu, *Green Chem.*, 2020, **22**, 7552–7559.
- [8] X. Li, X. Song, C. Ma, Y. Cheng, D. Shen, S. Zhang, W. Liu, P. Huo, and H. Wang, *ACS Appl. Nano Mater.* 2020, **3**, 1298–1306
